# Supplementary material for: Chromatin profiling identifies chondrocyte-specific Sox9 enhancers important for skeletal development
Source: JCI journal article supplement (doi:10.1172/jci.insight.175486), 2024-06-09

Full unedited gel for Figure3B

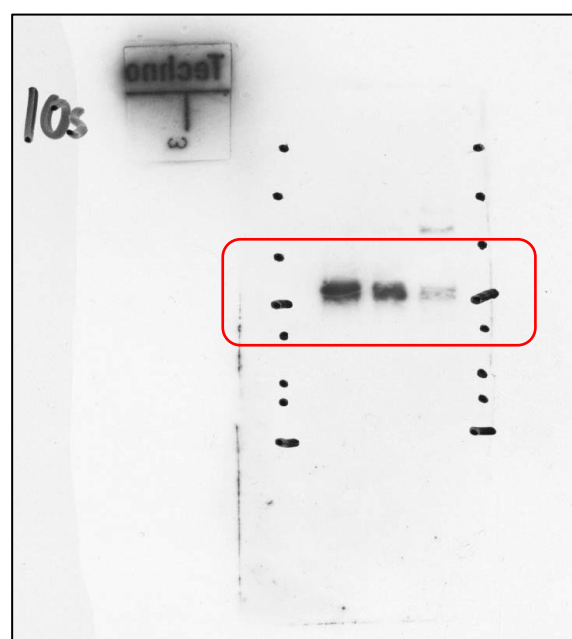

anti-Sox9

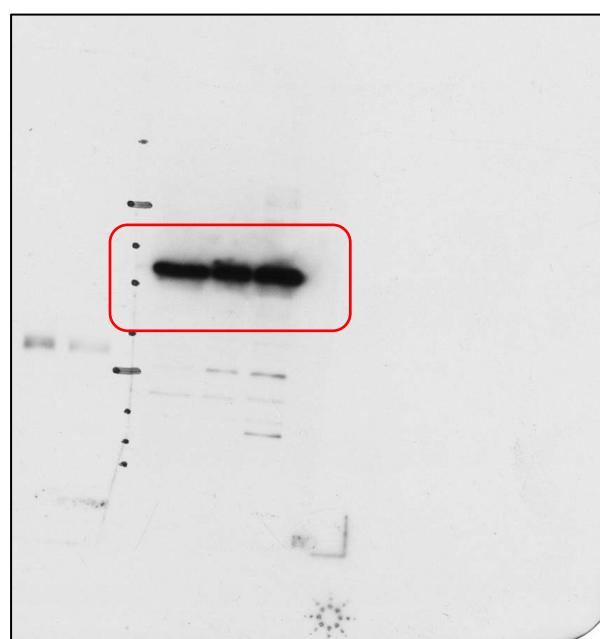

anti-bActin

Full unedited gel for Figure3D

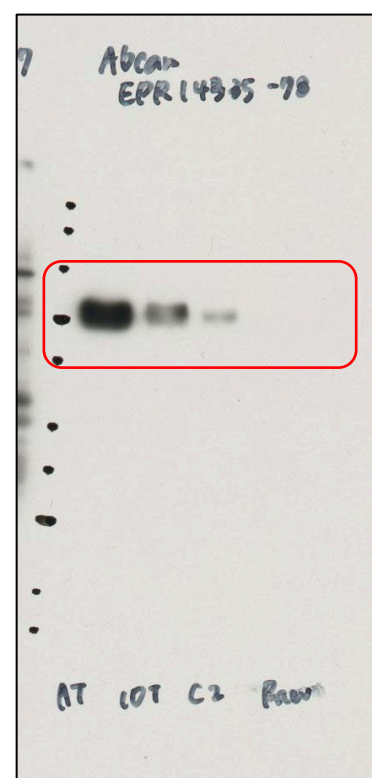

anti-Sox9

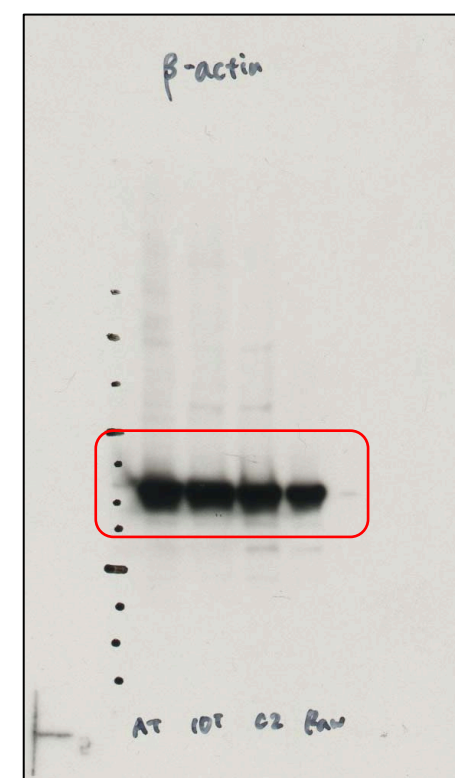

anti-bActin

Full unedited gel for Figure 6B  
upper panel

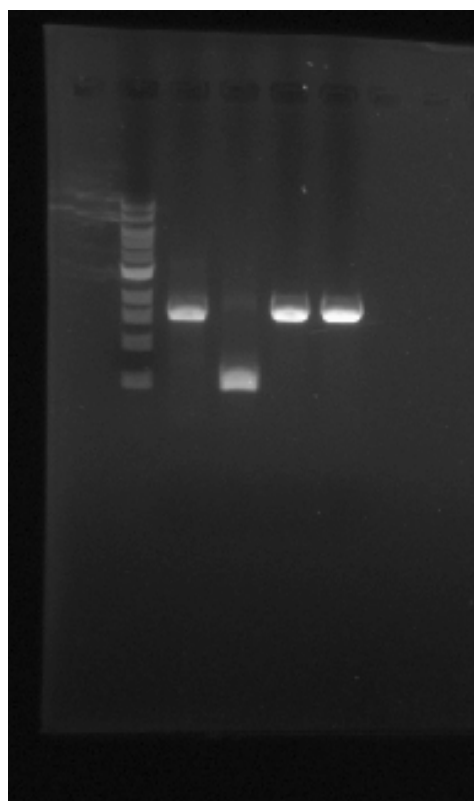

Full unedited gel for Figure 6B  
lower panel

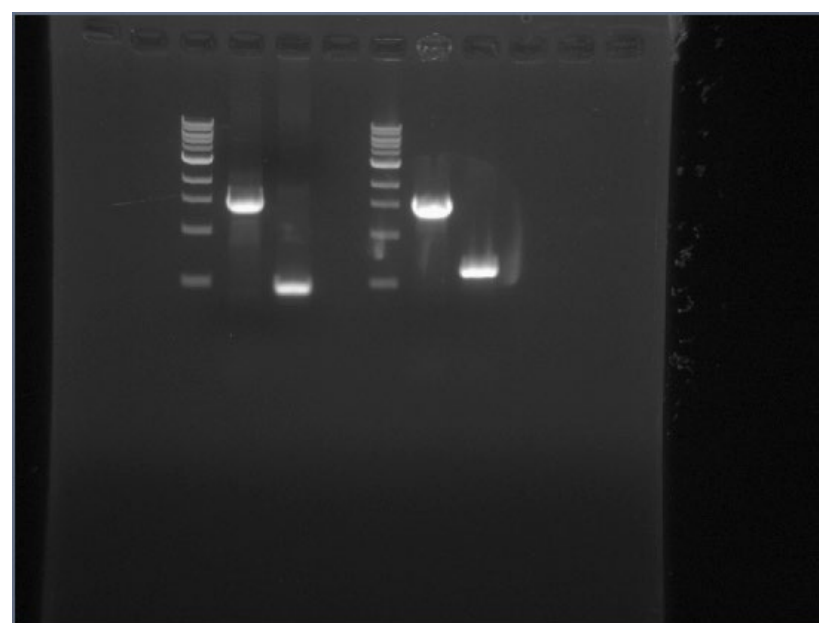

Full unedited gel for  
Supplementary Figure 5B

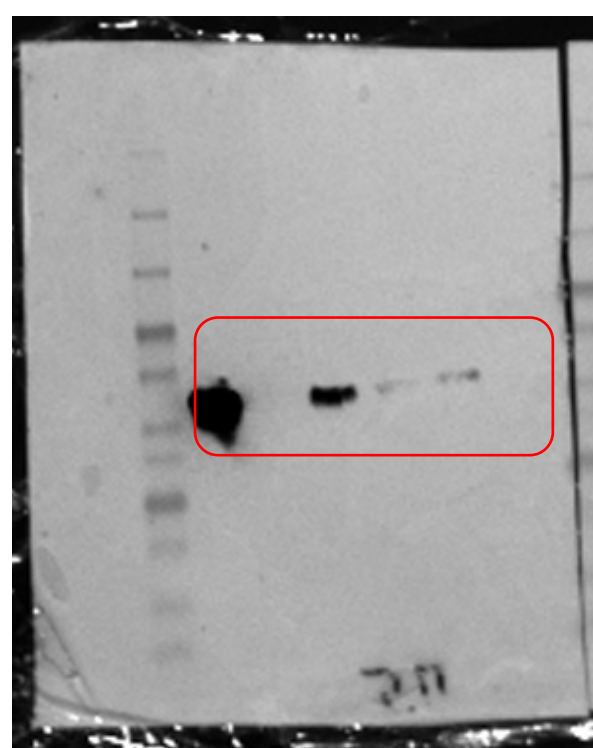

Full unedited gel for  
Supplementary Figure 5C

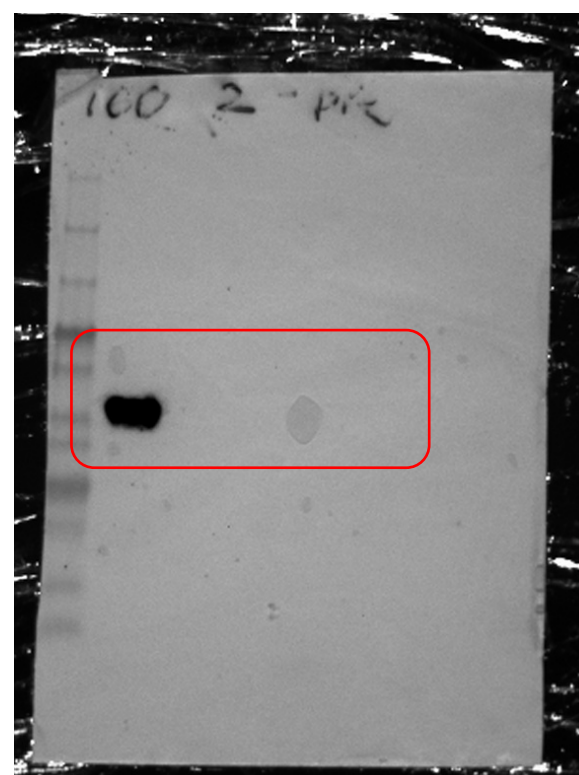

Full unedited gelfor  
Supplementary Figure 6B

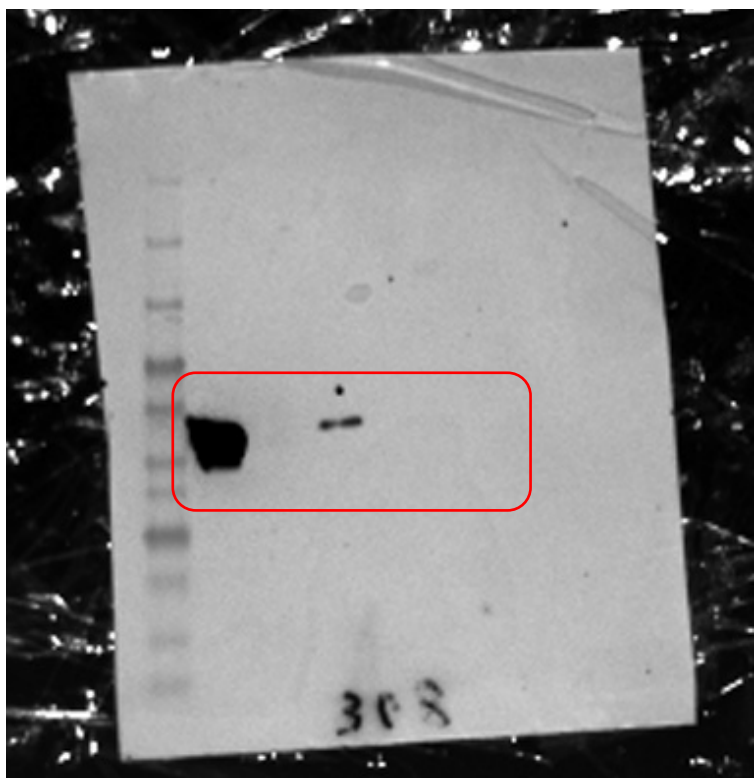

Full unedited gelfor  
Supplementary Figure 8B

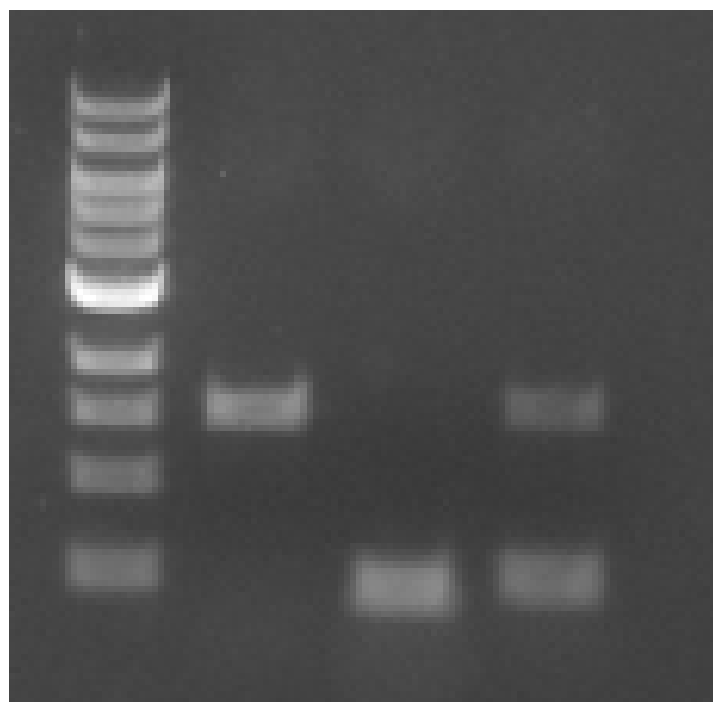

Full unedited gelfor  
Supplementary Figure 9B

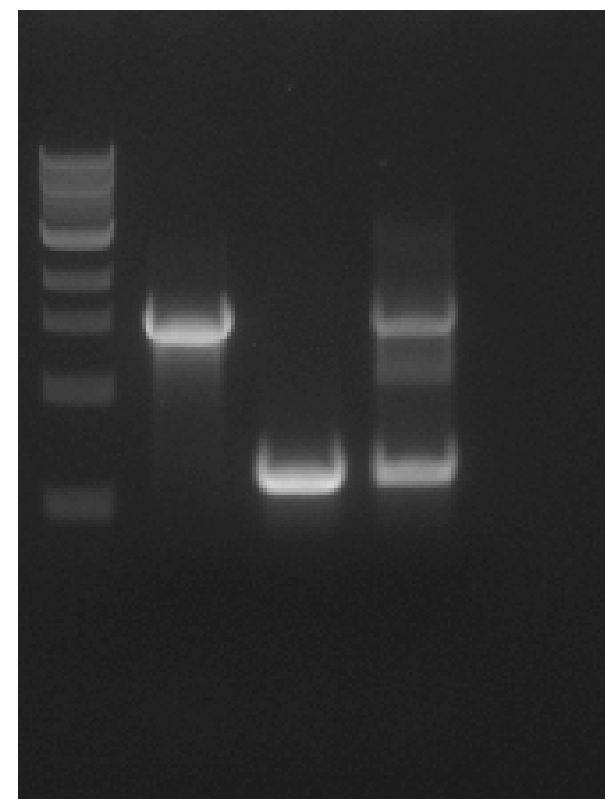

Full unedited gel for  
Supplementary Figure 10A  
anti-Flag

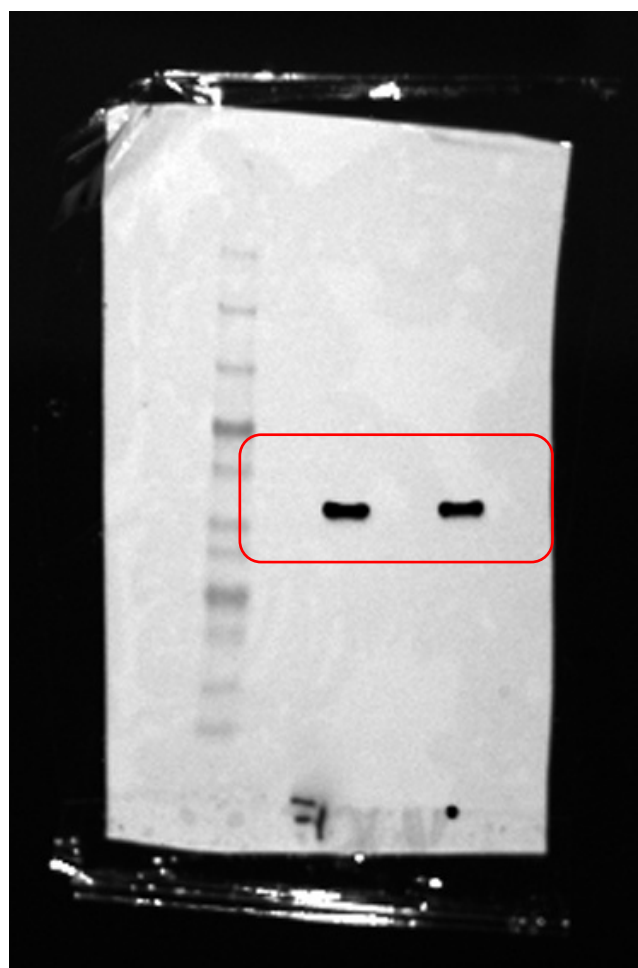

Full unedited gel for  
Supplementary Figure 10A  
anti-betaActin

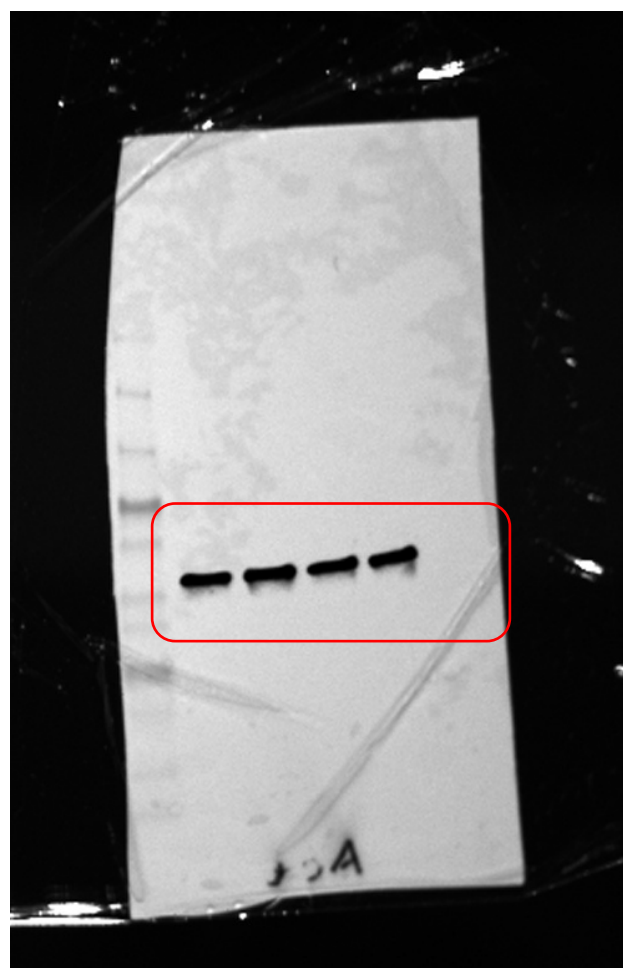

Supplement: sd2 [file 2]
